# Supplementary material
Source: PubMed Central journal article supplement (PMC2525726)
Supplement: 90310.2008_1.pdf [file 90310.2008_1.pdf]

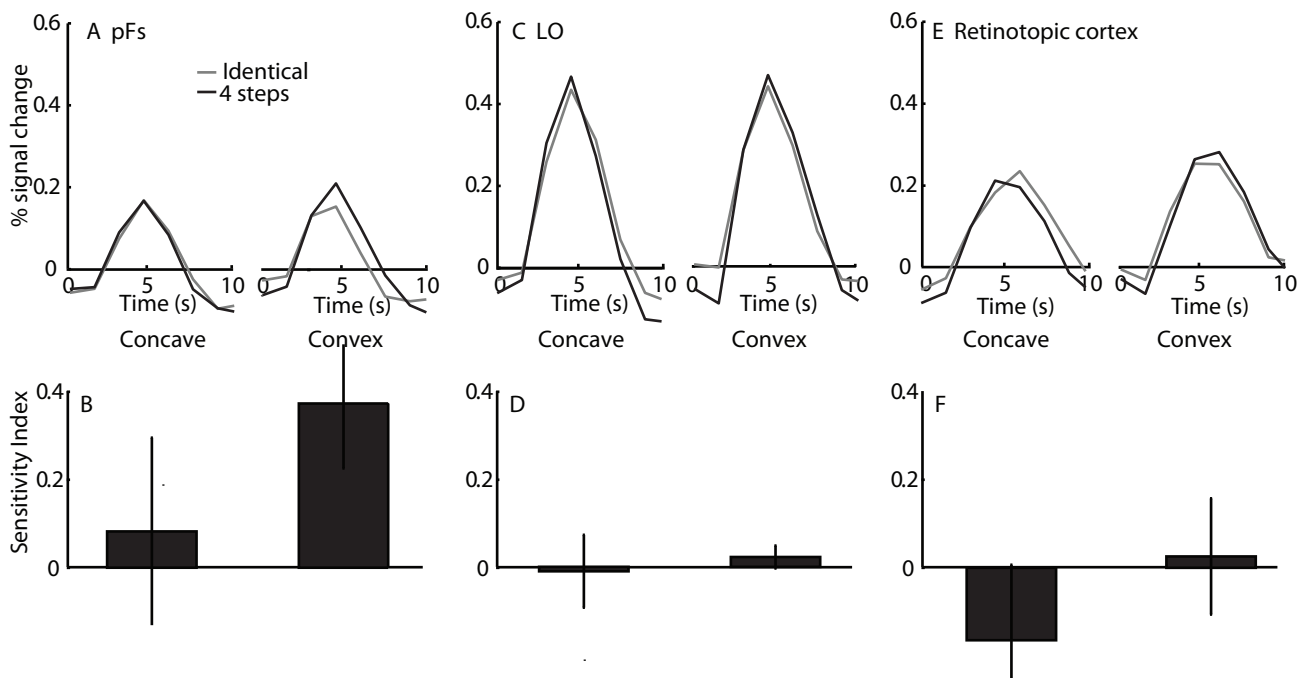

**Supp. Fig. 1.** fMRI results, Experiment 2, fixation over figure. Hemodynamic response curves in anterior LOC (pFs, 1a), posterior LOC (LO, 1c), and retinotopic cortex (1e) are shown separately for concave (left panels) and convex stimuli (right panels). Sensitivity index for pFs (1b), LO (1d), and retinotopic cortex (1f).
